# Supplementary material
Source: PubMed Central journal article supplement (PMC2544574)
Supplement: 0806584105_0806584105SI.pdf [file 0806584105_0806584105SI.pdf]

# Supporting Information

Menconi *et al.* 10.1073/pnas.0806584105

## SI Text

**Direct Sequencing of Exon 2 of the Human HLA-DRB1 Gene.** Genomic DNA was amplified and sequenced using allele specific primers as shown in [Table S5](#). PCRs were performed in a 20- $\mu$ l reaction mixture containing 50 ng genomic DNA; 5 pmol of each primer; PCR buffer containing 50 mmol/L KCl, 10 mmol/liter Tris-HCl (pH 8.3), 2.25 mmol/liter MgCl<sub>2</sub>, 200 mmol/liter each of deoxy (d)-ATP, dGTP, dTTP, and dCTP, and 1 unit of AmpliTaq

DNA polymerase (PE Applied Biosystems). Reaction mixtures were heated to 94°C for 7 min and then cycled 30 times as follows: 30 s at 94°C, 30 s at 55°C, and 30 s at 72°C. The PCR products were sequenced using the same allele-specific primers used for amplification ([Table S5](#)). Sequencing was performed using the ABI Big Dye DNA sequencing kit (Applied Biosystems), and the sequencing products were separated on an ABI-3130 automated sequencer (PE Applied Biosystems).

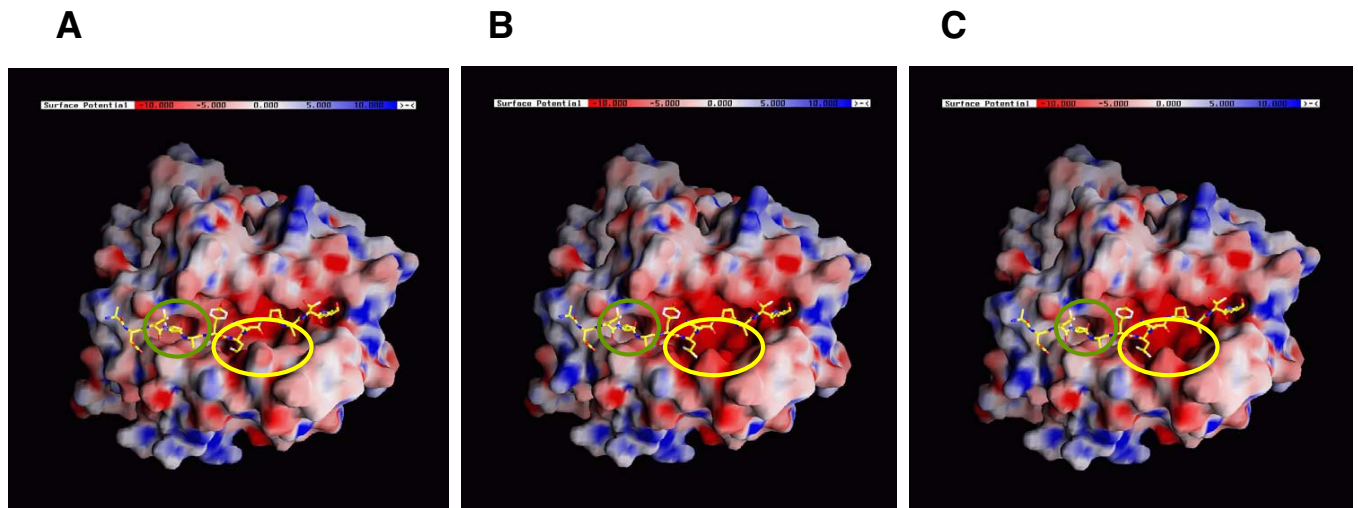

**Fig. S1.** Structural models of EAT-susceptible and -resistant I-E. (A) EAT-susceptible I-E ( $\beta 71$  Lys). (B) EAT-resistant I-E ( $\beta 71$  Glu). (C) EAT-resistant I-E ( $\beta 71$  Ala). The electrostatic potential was computed in each system to characterize the surface properties of the molecule. The differences are considered to be relevant to the predisposition to EAT. The peptide-binding groove is shown with the moth cytochrome c peptide. Significant differences were observed in P1 and P4 pockets (shown in green circles and yellow ellipses, respectively). In EAT-resistant I-E, both the P1 and P4 pockets are larger in size. Thus, EAT-inducing peptides might bind to these larger pockets, but they are more likely to dissociate from MHC.

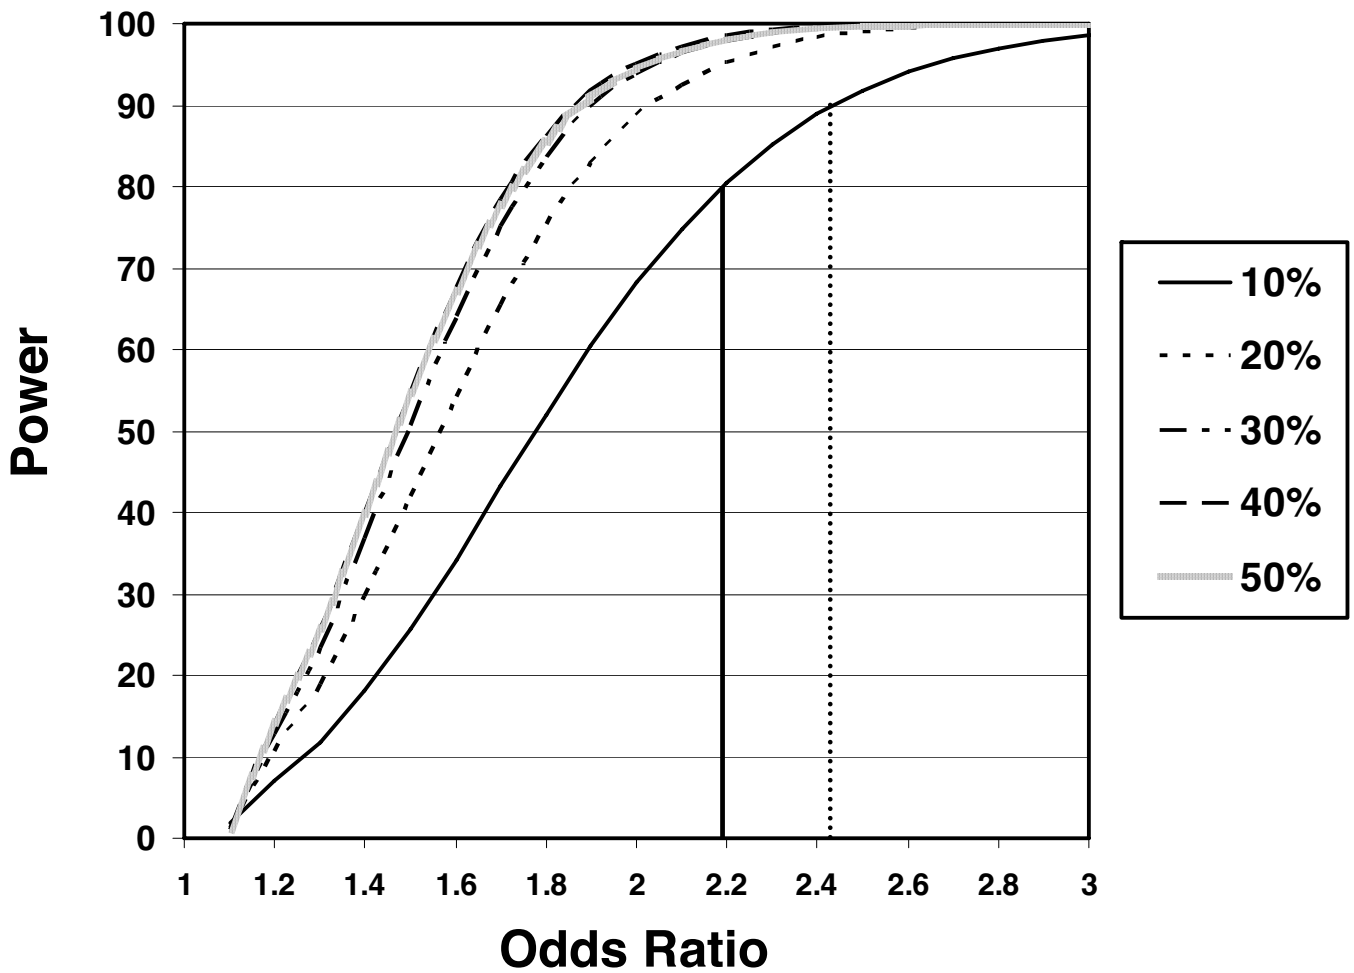

**Fig. S2.** Power calculation curves calculated for our study dataset of 94 patients and 149 controls. The x-axis shows the expected odds ratios (ORs), and the y-axis shows the power of the study. Each curve was calculated for a different minor allele frequency of the tested allele in the control population. The power curves show that our study had 80% power to detect a difference between the patients and the controls resulting in  $OR \geq 2.2$  with an alpha of 0.05; our study had 90% power to detect a difference between patients and controls resulting in  $OR \geq 2.43$  with an alpha of 0.05. Therefore, our study was adequately powered to detect significant associations of HLA-DR amino acid variants with HT.

**Table S1. HLA-DR typing in HT patients and controls**

| HLA-DR | HT (%)<br><i>n</i> = 94 | Controls (%)<br><i>n</i> = 153 | <i>P</i> value     |
|--------|-------------------------|--------------------------------|--------------------|
| 1      | 15 (8)                  | 44 (14.4)                      | 0.02               |
| 2      | 22 (11.7)               | 34 (11.1)                      | NS                 |
| 3      | 29 (15.4)               | 22 (7.2)                       | $2 \times 10^{-3}$ |
| 4      | 37 (19.7)               | 43 (14.1)                      | 0.06               |
| 7      | 17 (9)                  | 28 (9.2)                       | NS                 |
| 8      | 3 (1.6)                 | 17 (5.6)                       | 0.03               |
| 9      | 0 (0)                   | 4 (1.3)                        | NS                 |
| 10     | 4 (2.1)                 | 9 (2.9)                        | NS                 |
| 11     | 38 (20.2)               | 51 (16.7)                      | NS                 |
| 12     | 1 (0.5)                 | 5 (1.6)                        | NS                 |
| 13     | 18 (9.6)                | 37 (12.1)                      | NS                 |
| 14     | 4 (2.1)                 | 12 (3.9)                       | NS                 |

NS, not significant.

**Table S2. Polymorphic HLA-DR amino acid residues in HT patients and controls**

| Amino acid position | Amino acid variants | Patients (%)<br><i>n</i> = 188 | Controls (%)<br><i>n</i> = 298 | <i>P</i> value       |
|---------------------|---------------------|--------------------------------|--------------------------------|----------------------|
| 26                  | Tyrosine            | 34 (18)                        | 24 (8.1)                       | $6.9 \times 10^{-4}$ |
|                     | Others              | 154 (82)                       | 274 (91.9)                     |                      |
| 28                  | Aspartic acid       | 136 (72.3)                     | 191 (64.1)                     | 0.06                 |
|                     | Others              | 52 (27.7)                      | 107 (35.9)                     |                      |
| 30                  | Tyrosine            | 149 (79.3)                     | 192 (64.4)                     | $7.5 \times 10^{-4}$ |
|                     | Others              | 39 (20.7)                      | 106 (35.6)                     |                      |
| 32                  | Tyrosine            | 120 (63.8)                     | 187 (62.8)                     | Not significant      |
|                     | Others              | 68 (36.2)                      | 111 (37.2)                     |                      |
| 37                  | Tyrosine            | 81 (43.1)                      | 103 (34.6)                     | 0.06                 |
|                     | Others              | 107 (56.9)                     | 195 (65.4)                     |                      |
| 47                  | Tyrosine            | 99 (52.7)                      | 188 (63.1)                     | 0.02                 |
|                     | Others              | 89 (47.3)                      | 110 (34.6)                     |                      |
| 57                  | Aspartic acid       | 149 (79.3)                     | 227 (76.2)                     | Not significant      |
|                     | Others              | 39 (20.7)                      | 71 (23.8)                      |                      |
| 67                  | Phenylalanine       | 32 (17)                        | 39 (13.1)                      | Not significant      |
|                     | Others              | 156 (20.7)                     | 259 (86.9)                     |                      |
| 70                  | Glutamine           | 124 (66)                       | 161 (54)                       | $4.3 \times 10^{-3}$ |
|                     | Others              | 64 (34)                        | 137 (46)                       |                      |
| 71                  | Lysine              | 89 (47.3)                      | 69 (23.2)                      | $1.7 \times 10^{-8}$ |
|                     | Others              | 99 (52.7)                      | 229 (76.8)                     |                      |
| 74                  | Arginine            | 27 (14.4)                      | 14 (4.7)                       | $1.5 \times 10^{-4}$ |
|                     | Others              | 161 (85.6)                     | 284 (95.3)                     |                      |
| 77                  | Threonine           | 139 (73.9)                     | 218 (73.2)                     | Not significant      |
|                     | Others              | 49 (26.1)                      | 80 (26.8)                      |                      |
| 86                  | Valine              | 91 (48.4)                      | 141 (47.3)                     | Not significant      |
|                     | Others              | 97 (51.6)                      | 157 (52.7)                     |                      |

**Table S3. Polymorphic I-E amino acid residues in strains of mice susceptible and resistant to EAT**

| Amino acid position | Amino acid variants   | Susceptible mice (%) | Resistant mice (%) |
|---------------------|-----------------------|----------------------|--------------------|
|                     |                       | <i>n</i> = 12        | <i>n</i> = 10      |
| 6                   | Tryptophan            | 12 (100)             | 6 (60)             |
|                     | Arginine              |                      | 4 (40)             |
| 9                   | Glutamic acid         | 12 (100)             | 9 (90)             |
|                     | Glycine               |                      | 1 (10)             |
| 10                  | Tyrosine              | 12 (100)             | 10 (100)           |
| 11                  | Cysteine              | 12 (100)             | 7 (70)             |
|                     | Valine                |                      | 3 (30)             |
| 12                  | Lysine                | 11 (92)              | 6 (60)             |
|                     | Threonine             | 1 (8)                | 4 (40)             |
| 23                  | Arginine              | 12 (100)             | 7 (70)             |
|                     | Histidine             |                      | 3 (30)             |
| 26                  | Leucine               | 11 (92)              | 5 (50)             |
|                     | Phenylalanine         | 1 (8)                | 5 (50)             |
| 28                  | Glutamic acid         | 1 (8)                | 8 (80)             |
|                     | Valine                | 11 (92)              |                    |
|                     | Lysine                |                      | 1 (10)             |
|                     | Aspartic acid         |                      | 1 (10)             |
| 30                  | Tyrosine              | 12 (100)             | 7 (70)             |
|                     | Phenylalanine         |                      | 3 (30)             |
| 31                  | Phenylalanine         | 12 (100)             | 7 (70)             |
|                     | Isoleucine            |                      | 3 (30)             |
| 34                  | Leucine               | 12 (100)             | 6 (60)             |
|                     | Arginine              |                      | 4 (40)             |
| 37                  | Asparagine            | 12 (100)             | 9 (90)             |
|                     | Tryptophan            |                      | 1 (10)             |
| 38                  | Leucine               | 12 (100)             | 9 (90)             |
|                     | Valine                |                      | 1 (10)             |
| 47                  | Phenylalanine         | 12 (100)             | 6 (60)             |
|                     | Tyrosine              |                      | 4 (40)             |
| 51                  | Threonine             | 12 (100)             | 10 (100)           |
| 57                  | Aspartic acid         | 12 (100)             | 9 (90)             |
|                     | Glutamic acid         |                      | 1 (10)             |
| 63                  | Serine                | 12 (100)             | 9 (90)             |
|                     | Arginine              |                      | 1 (10)             |
| 67                  | Phenylalanine         | 11 (92)              | 5 (50)             |
|                     | Isoleucine            | 1 (8)                | 5 (50)             |
| 68                  | Leucine               | 12 (100)             | 10 (100)           |
| 70                  | Glutamine             | 12 (100)             | 7 (70)             |
|                     | Aspartic acid         |                      | 3 (30)             |
| 71                  | Lysine                | 11 (92)              | 6 (60)             |
|                     | Arginine              | 1 (8)                | 1 (10)             |
| 74                  | Glutamic acid/Alanine |                      | 3 (30)             |
|                     | Glutamic acid         | 10 (83)              | 5 (50)             |
|                     | Alanine               | 2 (17)               | 2 (20)             |
|                     | Serine                |                      | 3 (30)             |
| 78                  | Valine                | 10 (83)              | 5 (50)             |
|                     | Tyrosine              | 2 (17)               | 5 (50)             |
| 81                  | Histidine             | 11 (92)              | 10 (100)           |
|                     | Arginine              | 1 (8)                |                    |
| 86                  | Serine                |                      | 9 (100)            |
|                     | Phenylalanine         | 10 (83)              | 1 (10)             |
| 88                  | Leucine               | 2 (17)               |                    |
|                     | Lysine                | 2 (17)               | 9 (100)            |
|                     | Asparagine            | 10 (83)              | 1 (10)             |
| 92                  | Arginine              | 3 (25)               | 9 (100)            |
|                     | Proline               | 9 (75)               | 1 (10)             |

**Table S4. List of EAT-associated amino acid residues in I-E, their positions in peptide-binding pockets, and changes upon amino acid substitutions**

| Residue*                    | MHC pocket <sup>†</sup>                 | Susceptible                         | Resistant                                        | Changes <sup>‡</sup>                  |
|-----------------------------|-----------------------------------------|-------------------------------------|--------------------------------------------------|---------------------------------------|
| $\beta$ 26                  | P4 (bottom)                             | Leu<br>( $P = 0.03$ )               | Phe<br>( $P = 0.03$ )                            | Larger in size                        |
| <b><math>\beta</math>28</b> | P4 (bottom)<br>P6 (bottom) <sup>‡</sup> | Val<br>( $P = 1.8 \times 10^{-5}$ ) | Glu <sup>¶</sup><br>( $P = 6.6 \times 10^{-4}$ ) | Negative, polar                       |
| <b><math>\beta</math>30</b> | P6 (bottom)                             | Tyr<br>( $P = 0.04$ )               | Phe                                              | Loss of -OH                           |
| <b><math>\beta</math>71</b> | P4 (side)                               | Lys <sup>§</sup><br>( $P = 0.04$ )  | Glu <sup>¶</sup> /Ala<br>( $P = 0.04$ )          | Smaller in size<br>negative/uncharged |
| $\beta$ 74                  | P4 (side)                               | Glu <sup>¶</sup><br>( $P = 0.03$ )  | Ser<br>( $P = 0.03$ )                            | Smaller in size<br>uncharged          |
| <b><math>\beta</math>86</b> | P1 (bottom)                             | Phe<br>( $P = 6.1 \times 10^{-4}$ ) | Ser<br>( $P = 1.9 \times 10^{-5}$ )              | Smaller in size polar                 |
| <b><math>\beta</math>88</b> | P1 (side)                               | Asn<br>( $P = 6.1 \times 10^{-4}$ ) | Lys <sup>§</sup><br>( $P = 6.1 \times 10^{-4}$ ) | Larger in size positive               |

\*The five residues shown in bold ( $\beta$ 28,  $\beta$ 30,  $\beta$ 71,  $\beta$ 86, and  $\beta$ 88) interact directly with the antigenic peptide.

<sup>†</sup>The location of amino acid in MHC pocket is described in parentheses, such as bottom, side, and above.

<sup>‡</sup>The changes described here reflect the change in the amino acid residue itself (resulting from the amino acid substitution from EAT-susceptible to -resistant residue), not the changes in MHC pocket. Blue, positive charge; red, negative charge.

<sup>§</sup>Positive charge.

<sup>¶</sup>Negative charge.

<sup>‡</sup>Partially.

Table S5. Primers used for direct sequencing of exon 2 of the human *HLA-DRB1* gene

| HLA-DR         | Forward                | Reverse              | Size, bp |
|----------------|------------------------|----------------------|----------|
| 1              | TTCTTGGGCAGCTTAAGTT    | CCGCTGCACTGTGAAGCTCT | 266      |
| 2              | TTCCTGTGGCAGCCTAAGAGG  | CCGCTGCACTGTGAAGCTCT | 266      |
| 3              | TGGAGTACTCTACGTCT      | CAACCCCGTAGTTGTGTCTG | 234      |
| 4              | GTTTCTGGAGCAGGTTAAAC   | CCGCTGCACTGTGAAGCTCT | 266      |
| 7              | CCTGTGGACAGGGTAAGTATA  | CCGTAGTTGTGTCTGCACAC | 266      |
| 9              | AACCACGTTTCTTGAAGCAGGA | CCGTAGTTGTGTCTGCACAC | 266      |
| 10             | CCGTTGCTGGAAAGACGCG    | CCGCTGCACTGTGAAGCTCT | 266      |
| 11, 12, 13, 14 | AGTGTCTTCTCAGGAGGCCG   | TCACAGGGACTCAGGCCCG  | 359      |
